# Supplementary material
Source: Springer Nature journal article supplement (https://www.springermedizin.de/resource/supplementary/12939_2013_387_MOESM1_ESM.pdf/9551056)
Supplement: MOESM1 [file 9551056]

Eligible to take part in ALSPAC  
and part of GPRD (n=765)

```
graph TD; A[Eligible to take part in ALSPAC and part of GPRD (n=765)] --> B[Consented to linkage and had >0 days follow up in GPRD (n=753)]; B --> C[Enrolled in ALSPAC (n=522)]; C --> D[Complete socio-economic data (n=346)];
```

Consented to linkage and had >0  
days follow up in GPRD (n=753)

Enrolled in ALSPAC  
(n=522)

Complete socio-  
economic data (n=346)
